# Supplementary material for: The Passiflora tripartita (Banana Passion) Fruit: A Source of Bioactive Flavonoid C-Glycosides Isolated by HSCCC and Characterized by HPLC–DAD–ESI/MS/MS
Source: Molecules. 2013 Jan 28;18(2):1672–92. doi: 10.3390/molecules18021672 (PMC6270644; doi:10.3390/molecules18021672)

## Supplementary Materials

**Figure S1.** Proton NMR spectra of compound **31**. ( $\text{CD}_3\text{OD}$  and  $(\text{CD}_3)_2\text{SO}$ , 400 MHz).

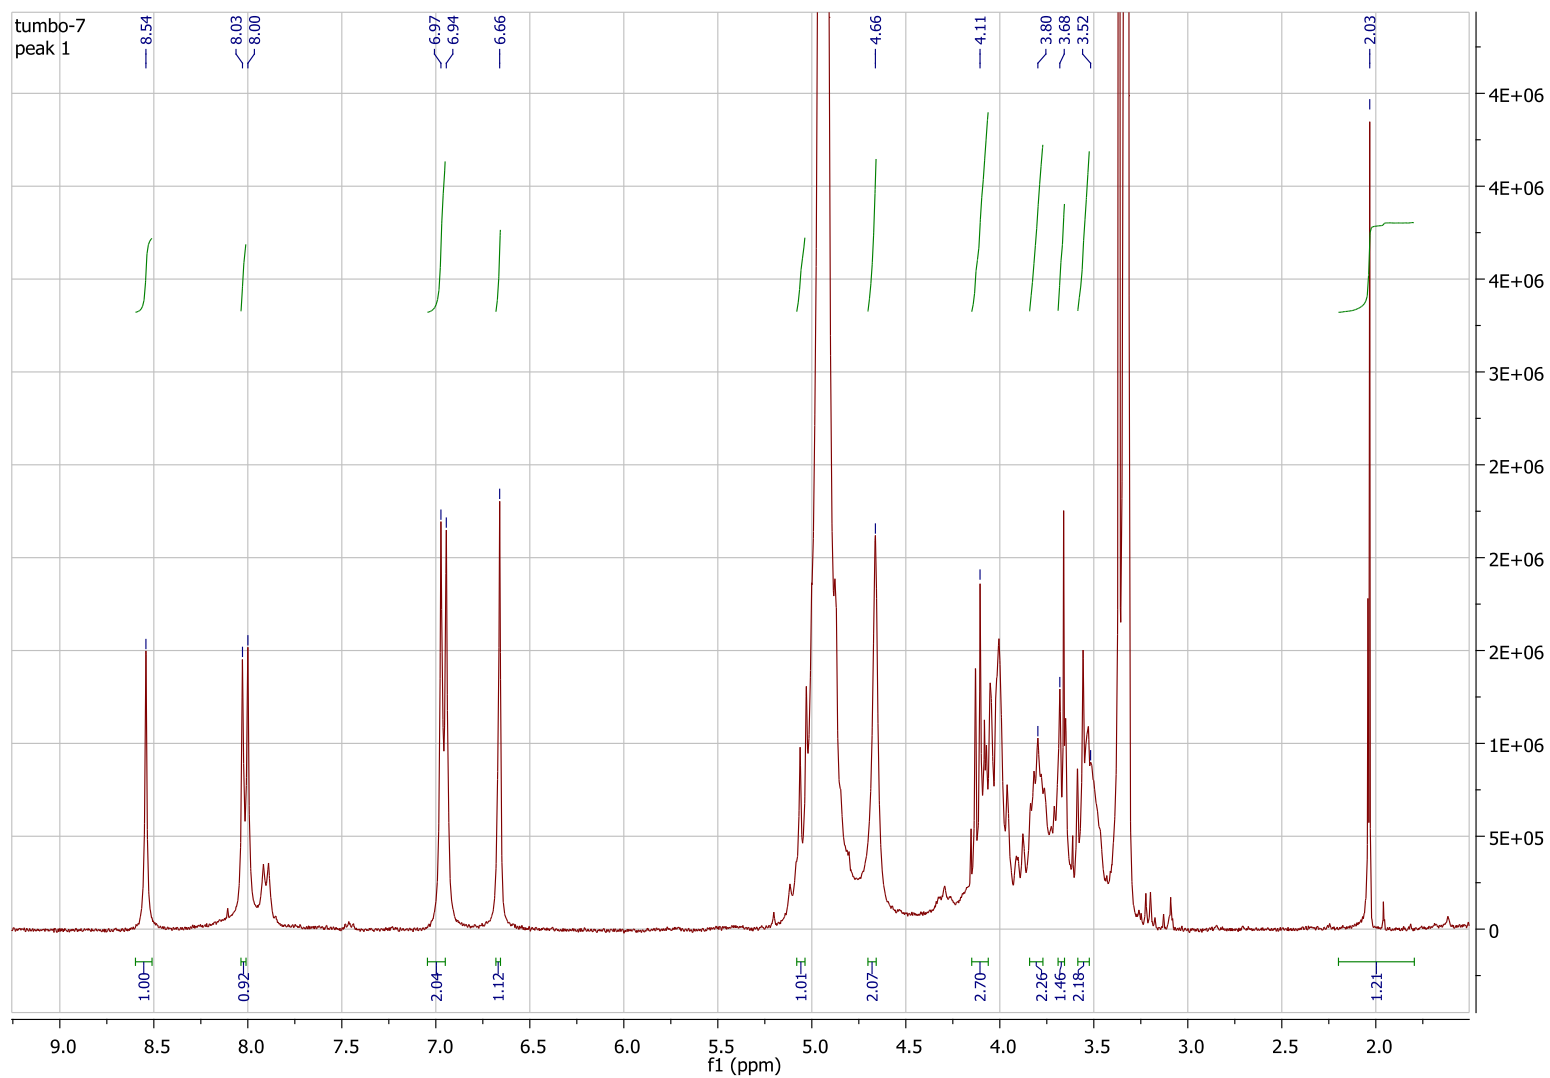

**Figure S2.** Proton NMR spectra of compound **31**. (CD<sub>3</sub>OD, 400 MHz).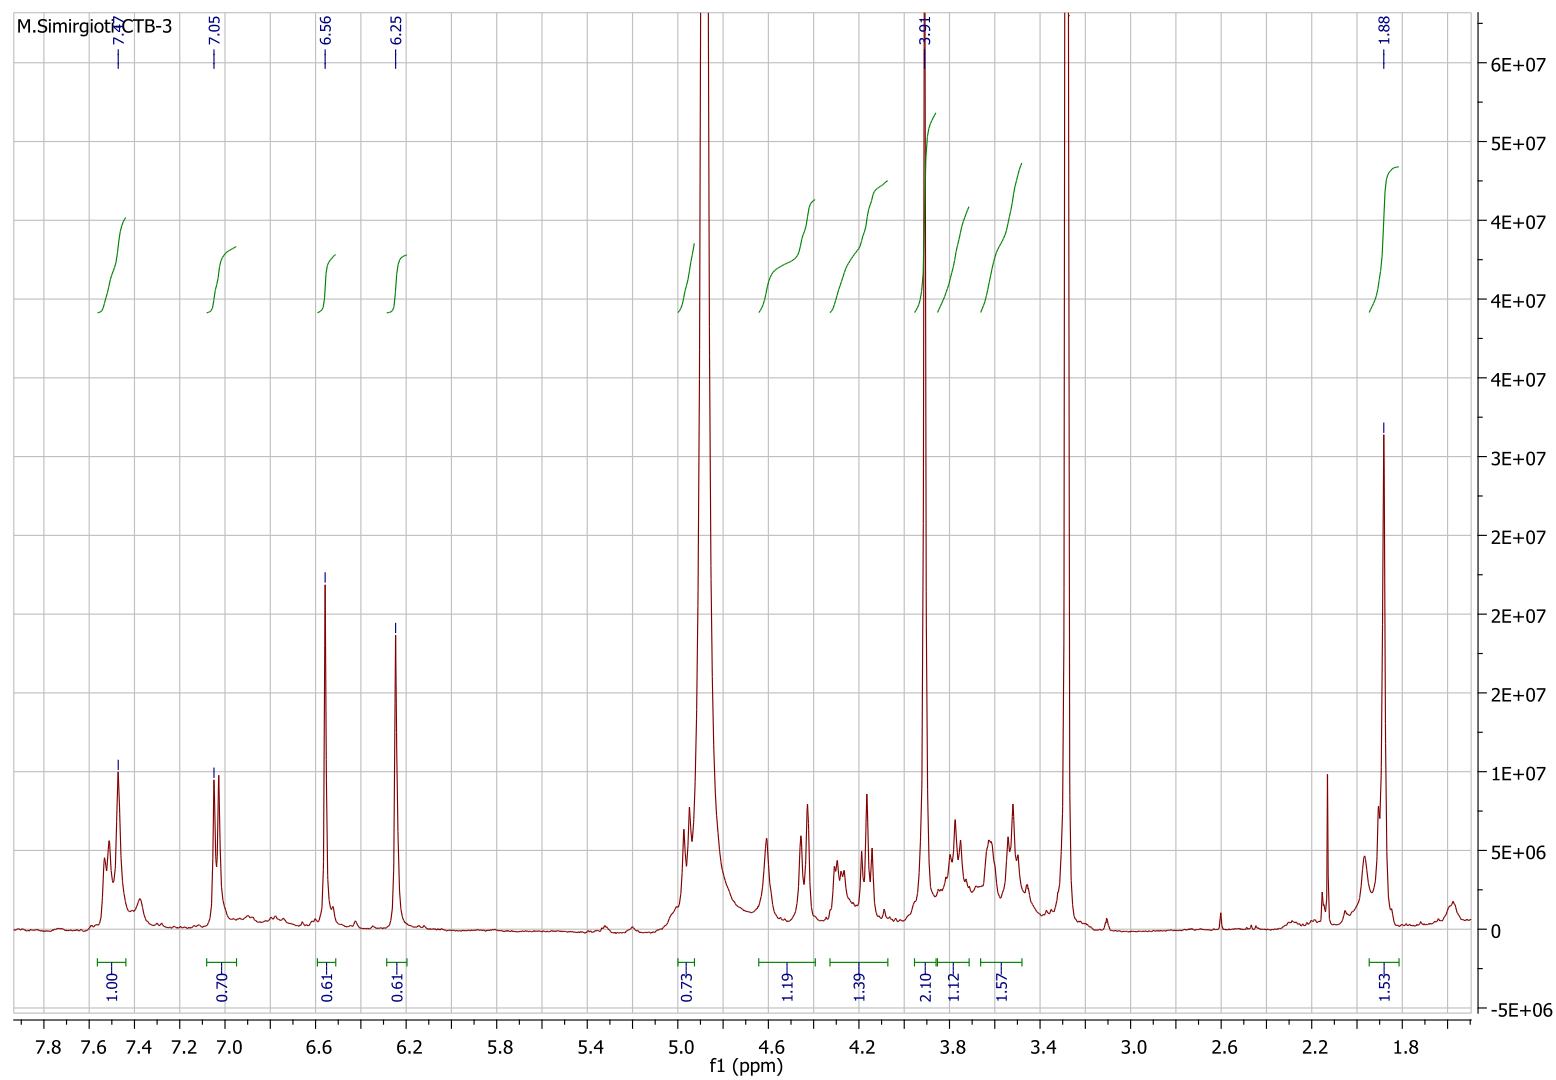

**Figure S3.** H-H COSY NMR spectra of compound **31**. (CD<sub>3</sub>OD, 400 MHz).

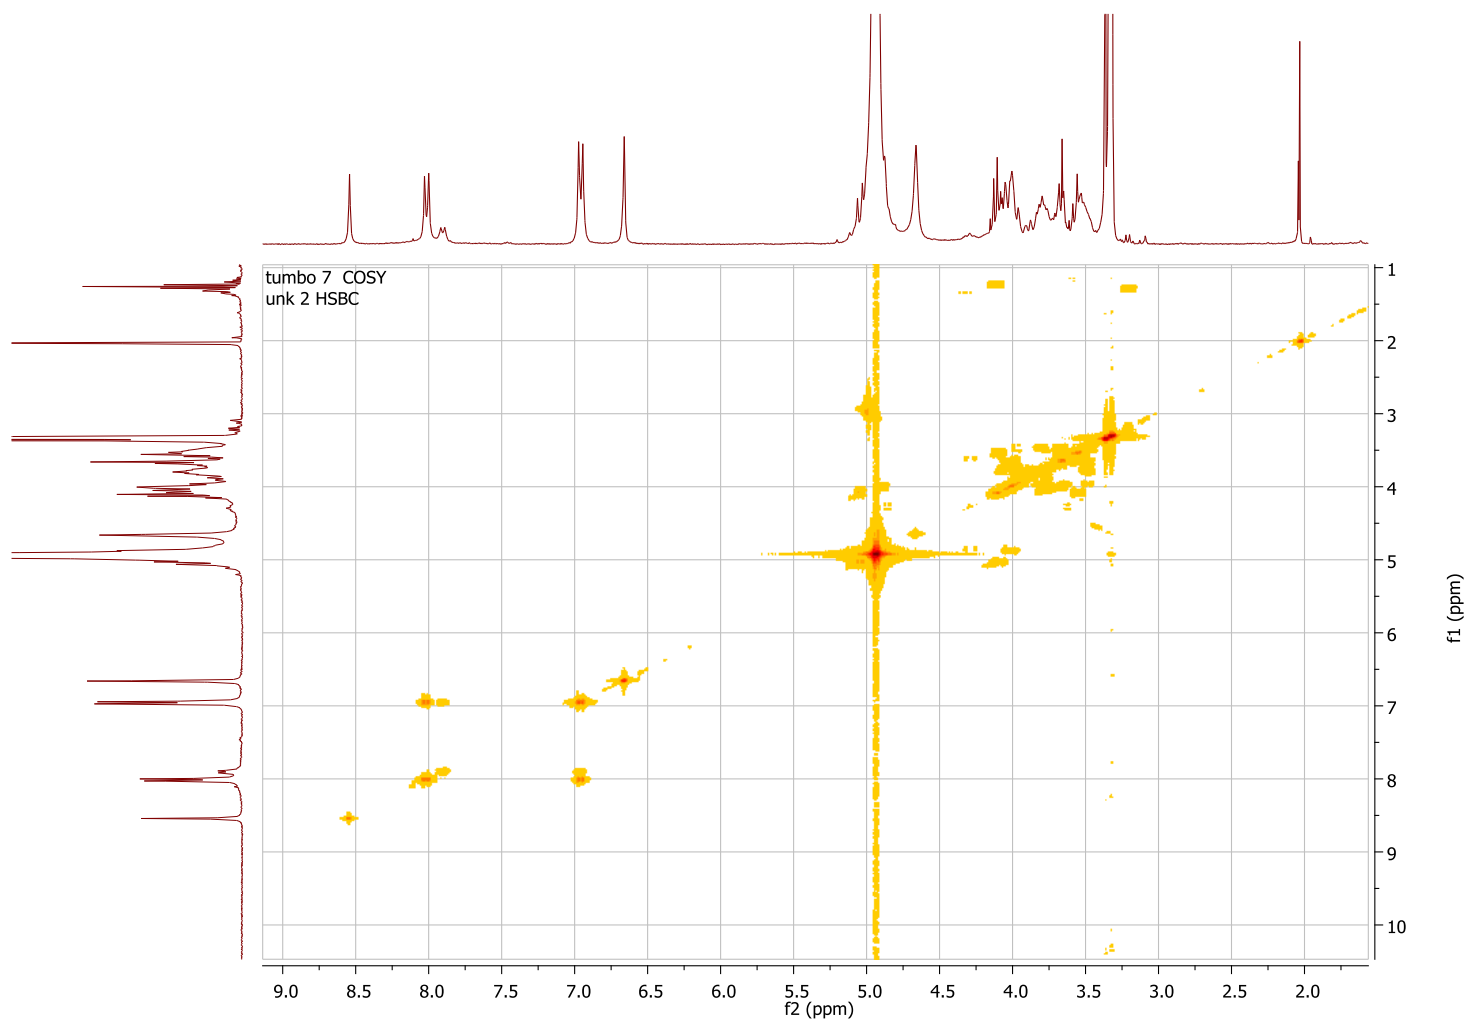

**Figure S4.** Ampliation in the sugar region of  $^1\text{H}$ - $^1\text{H}$  COSY NMR spectra of compound **31**. ( $\text{CD}_3\text{OD}$ , 400 MHz).

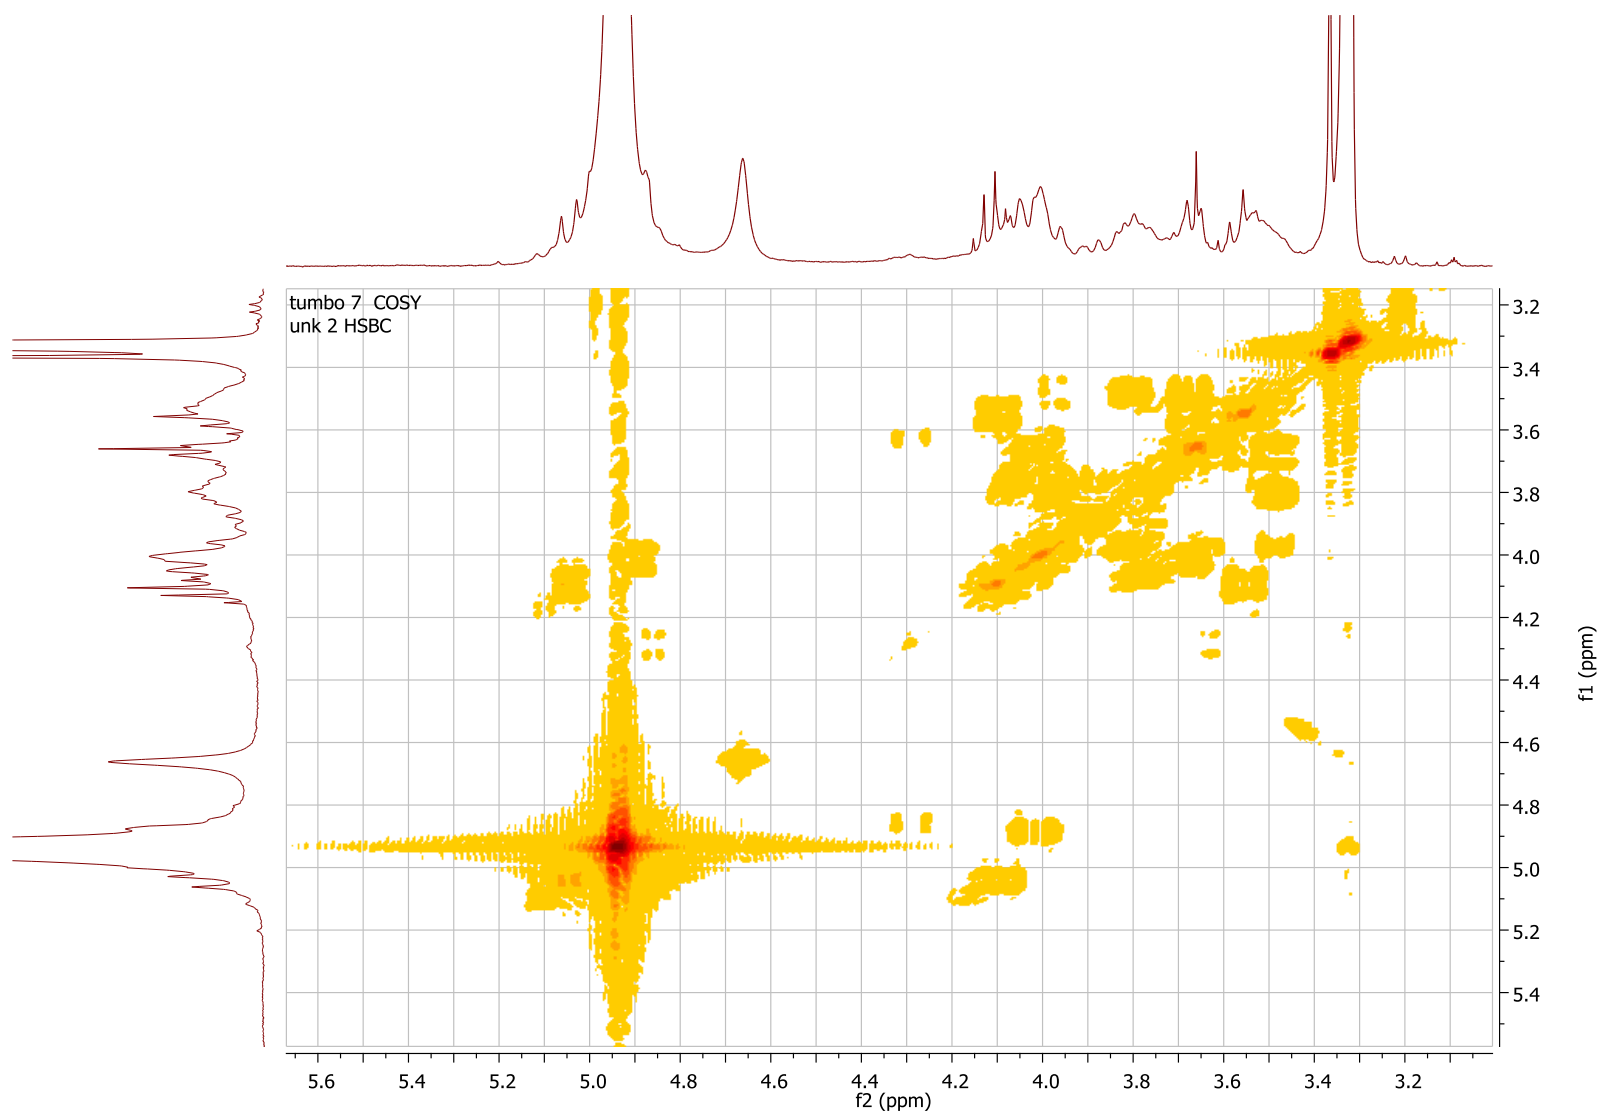

**Figure S5.** Full ESI MS spectra and MS<sup>n</sup> fragmentation of Peaks **10** (Leucenin II, 4''-methyl-eter), **16** (vitexin), and **19** (orientin) from Tumbo peel extracts.

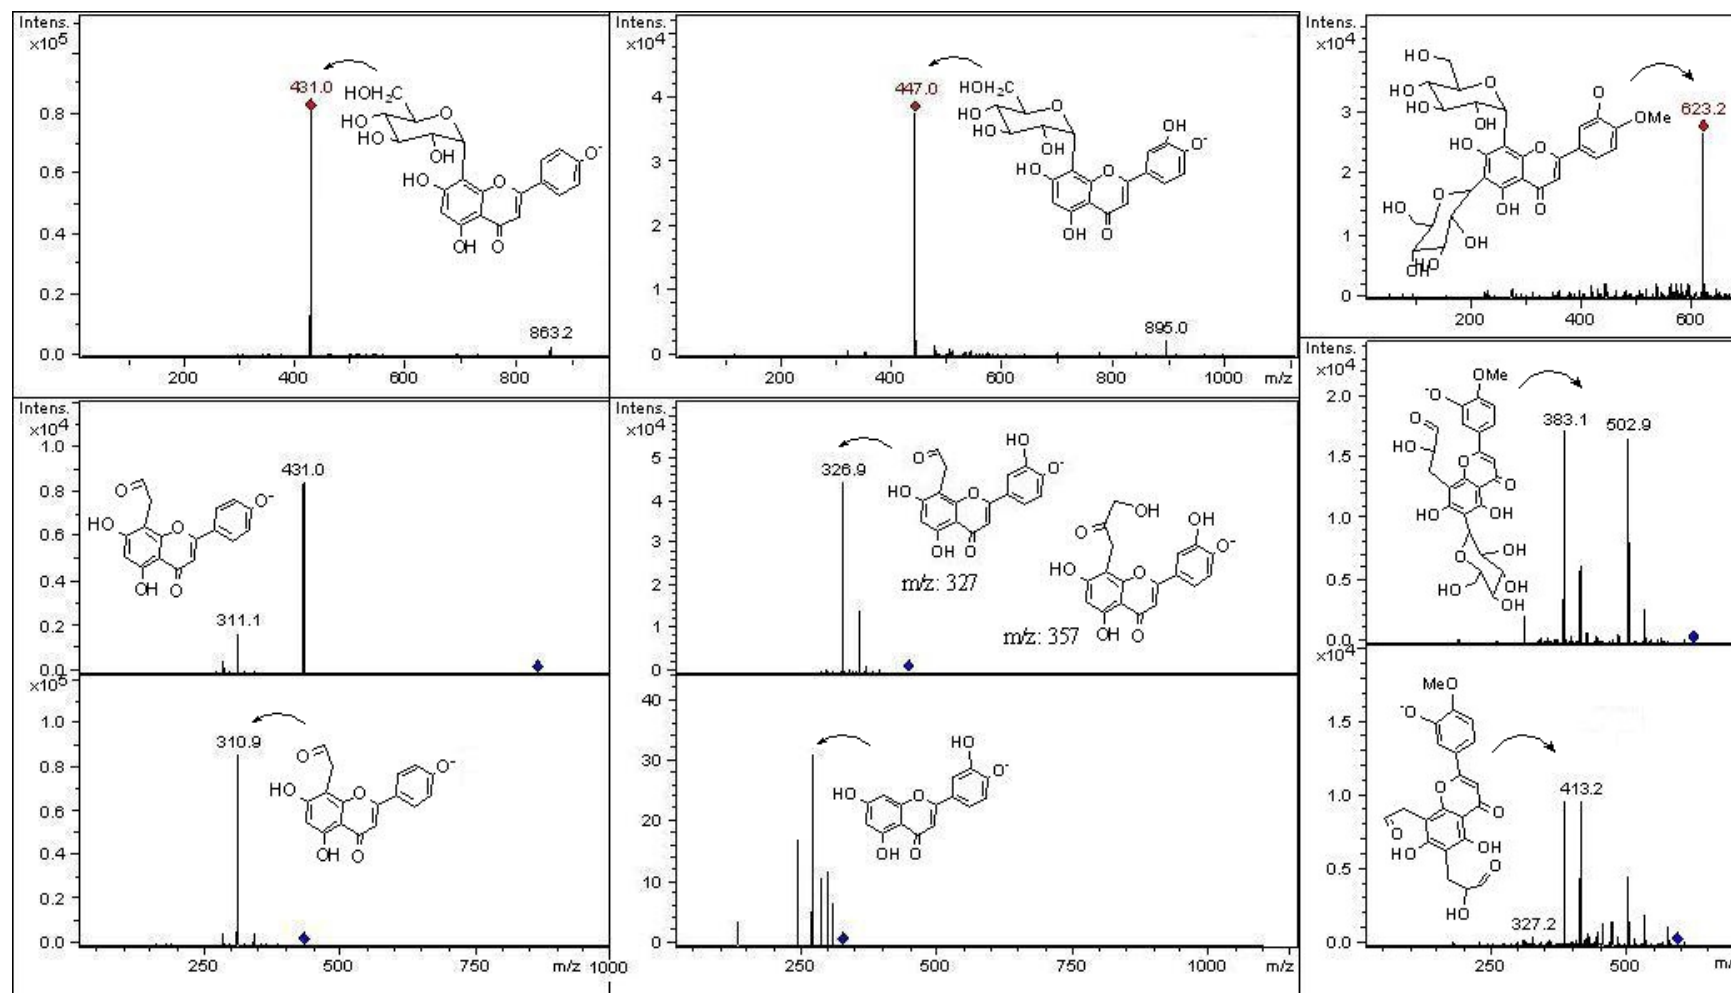

**Figure S6.** Photograph of ripe tumbo fruits collected in Pica, Chile in 2011.

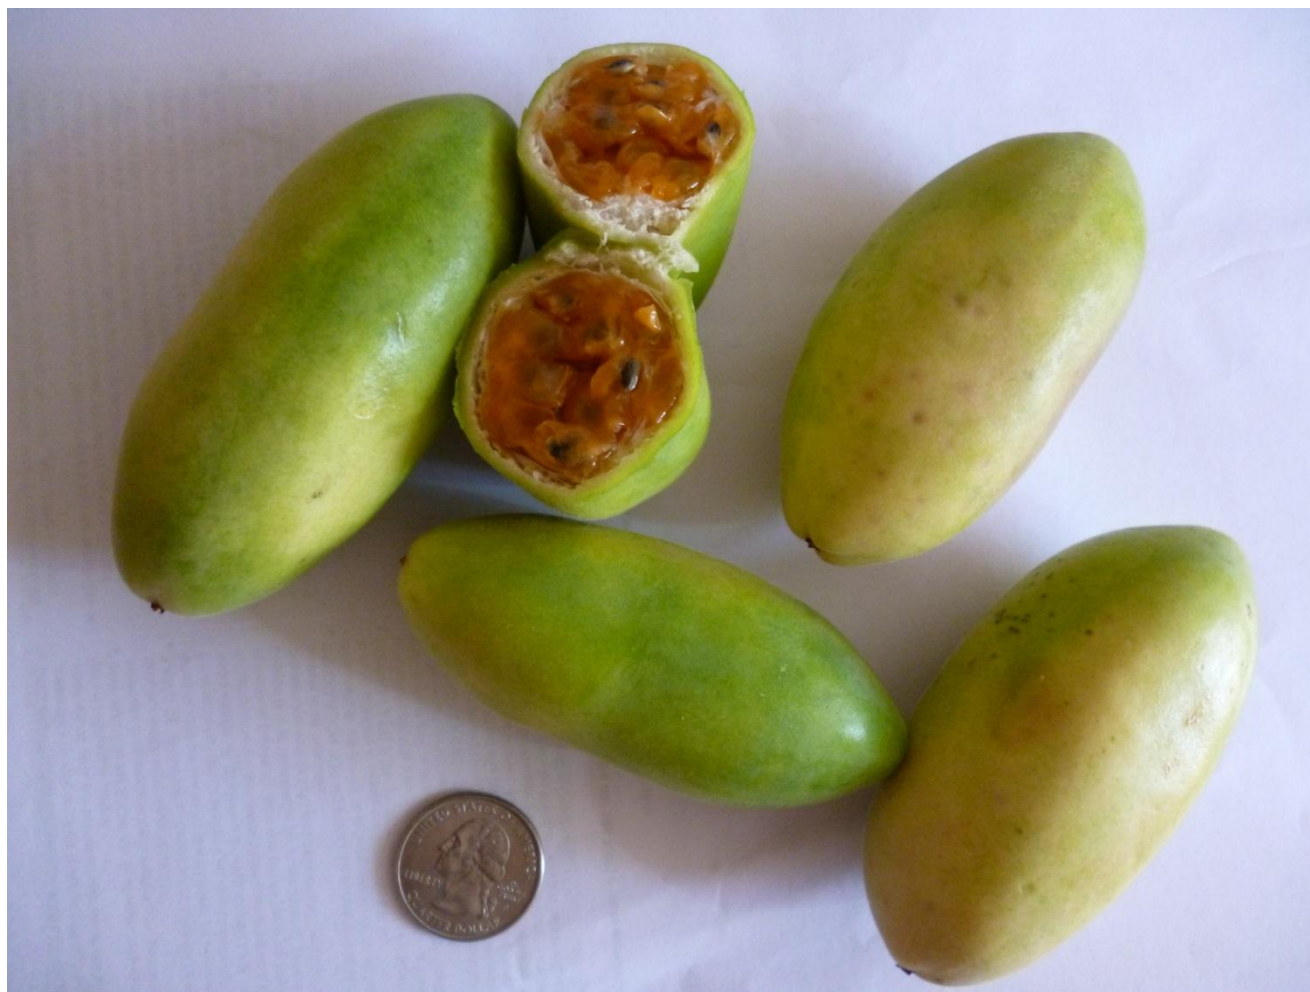

Supplement: Supplementary file 1 [file molecules-18-01672-s001.pdf]
